# Supplementary material
Source: Springer Nature journal article supplement (https://www.springermedizin.de/resource/supplementary/12943_2007_288_MOESM4_ESM.pdf/9553862)

POSTN/ACTB x 10<sup>4</sup>

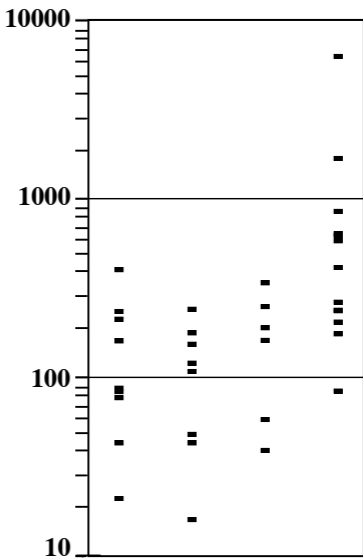

Breslow  
(mm)

  
<1

  
1.01-2

  
2.01-4

  
>4

Supplement: MOESM4 [file 9553862]
